# Supplementary material for: A brainstem preparation allowing simultaneous access to respiratory motor output and cellular properties of motoneurons in American bullfrogs
Source: Oxford University Press journal article supplement (doi:10.1242/jeb.244079), 2022-05-16
Supplement: jeb244079supp.pdf [file jeb244079supp.pdf]

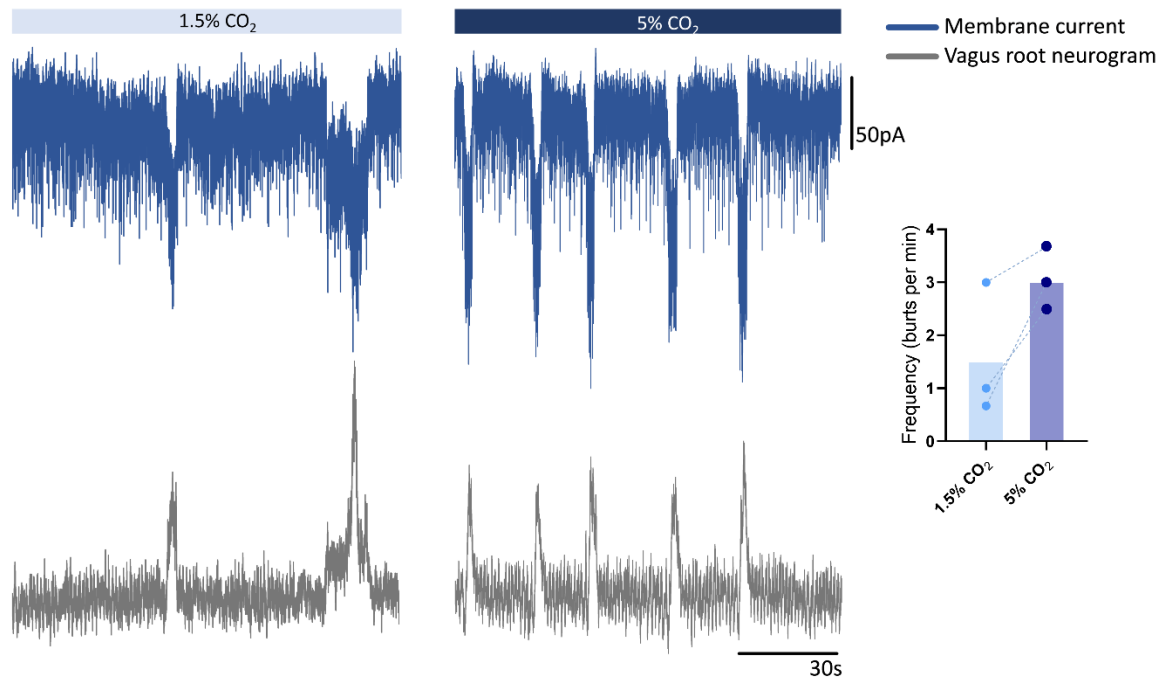

**Fig. S1. Chemosensitivity is preserved in the semi-intact preparation.** A) Representative traces showing increased burst frequency after 10 minutes of hypercapnia (aCSF CO<sub>2</sub> raised from 1.5% to 5%). B) All 3 preparations tested increased burst frequency in hypercapnia (average increase of 96%), which could be observed simultaneously in the cell respiratory synaptic input and in the population burst.

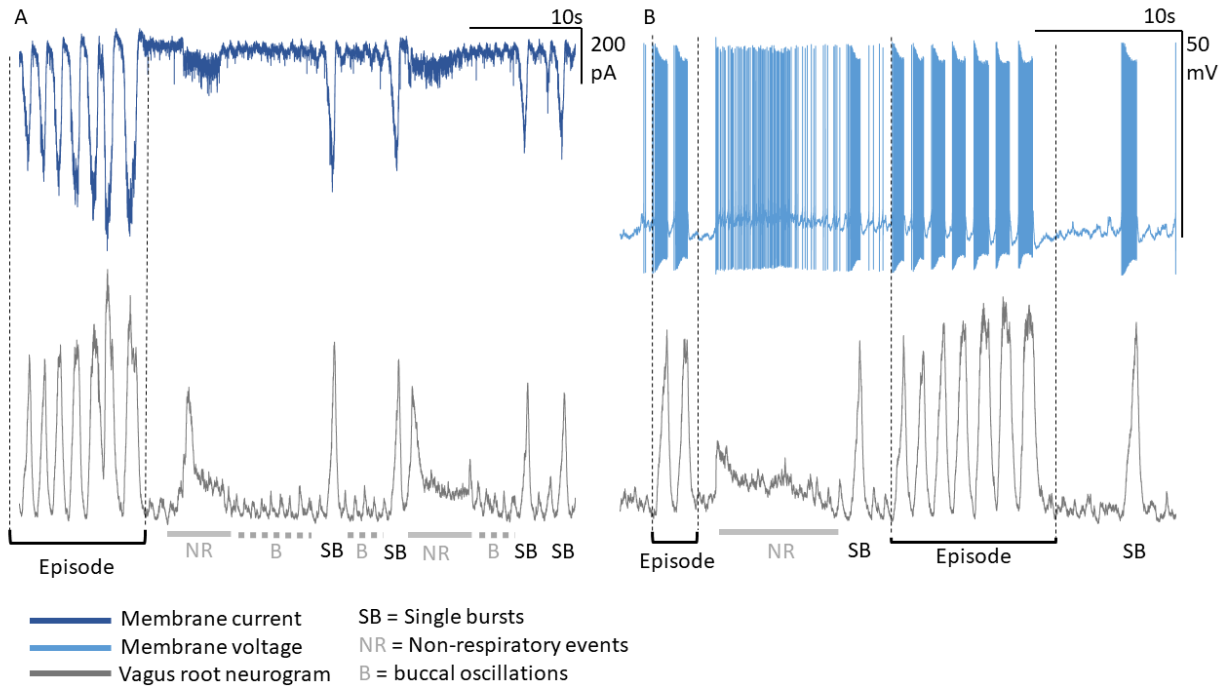

**Fig. S2. The semi-intact preparation presents single and episodic bursts.** Single bursts, doublets, episodic events, buccal oscillations, and non-respiratory events can be observed in the semi-intact preparation. Bursts occur concurrently with the respiratory-related synaptic current (A) and the motoneuron firing (B). The representative trace was recorded in control conditions (aCSF gassed with 1.5% CO<sub>2</sub> and 98.5% O<sub>2</sub>).
